## Effects of a multidisciplinary heart failure program in short term readmissions of heart failure patients, preliminary results

J. Gorris Magana, M.J. Espinosa Pascual, R. Abad Romero, R. Olsen Rodriguez, D. Nieto Ibanez, C. Perela Alvarez, A. Fraile Sanz, J. Saavedra Falero, J. Perea Egido

University Hospital of Getafe, Getafe, Spain  
On behalf of PROAMTIC

**Funding Acknowledgement:** Type of funding source: None

**Background:** Unexpected readmissions are frequent among heart failure patients, due to their natural history that implies multiple readmissions, with high costs and clinical relevance.

**Purpose:** We aimed to assess the impact of a Multidisciplinary Heart Failure Program (MHFP) on the readmission-free period after an episode of acute decompensated heart failure (ADHF).

**Methods:** We carried out an analytical and observational study including all patients admitted to our University Hospital, which covers 220,000 individuals, with an episode of heart failure when there was not a Multidisciplinary Heart Failure Program (January 2013 to December 2013). Once the MHFP was established, we compared non-MHFP patients with every patient admitted during February 2019 and February 2020 in terms of clinical data, imaging technique findings and short-term readmissions.

**Results:** The rate of readmission during this period was a 24.8% in non-

MHFP and 17.2% in MHFP ( $p=0.15$ ). However, we could find differences in median time to readmission due to ADHF, that was 1.74 months (CI 95%, 0.12–3.35) in non-MHFP, compared to 5.125 months (CI 95%, 4.15–6.09) in MHFP ( $p=0.002$ ) (see Graph 1). There were also no significant differences in terms of basic characteristics between the MHFP and the non-MHFP patients (age, gender, left ventricular ejection fraction, left bundle branch block, hypertension). It is remarkable that establishing a MHFP has lengthened the readmission-free period. The rate of decompensation in the first and sixth month was respectively in the non-MHFP 9% and 21%; and in the MHFP 2% and 10%.

**Conclusion:** According to our results, the implantation of this Multidisciplinary Heart Failure Program has shown a reduction in the time to ADHF readmission compared with a cohort of similar pts some years before, which is clinically relevant.

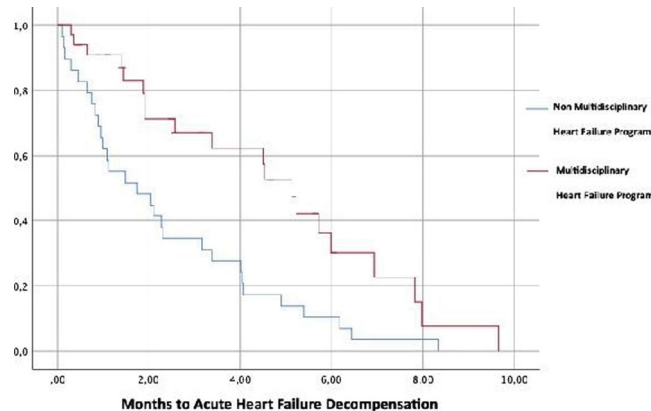

Graph 1
